# Supplementary material for: Major pollutant changes affected by Covid-19 lockdown in Shanghai
Source: Research Square preprint supplement (doi:10.21203/rs.3.rs-659194/v1), 2021-06-30

**Supllimentary materials**

**SFig.1** NMDS analysis of different polutants before and during lockdown period


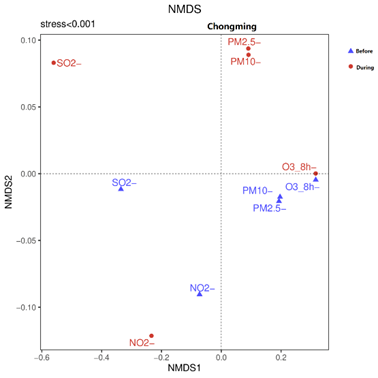

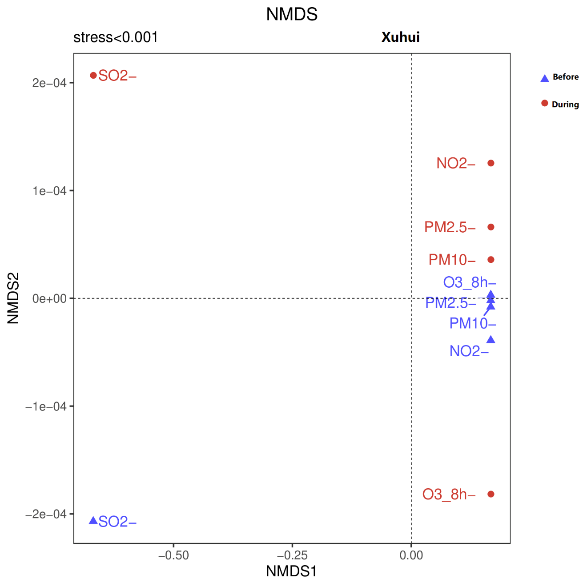


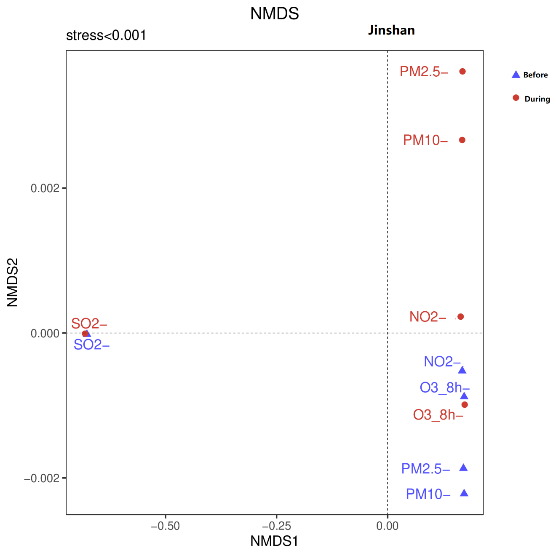

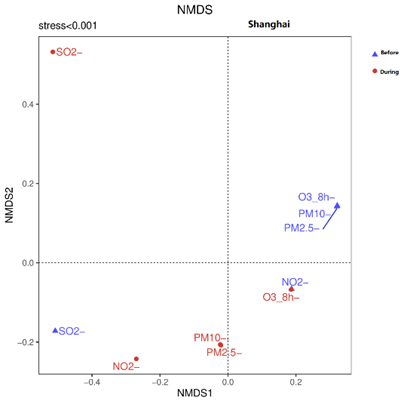


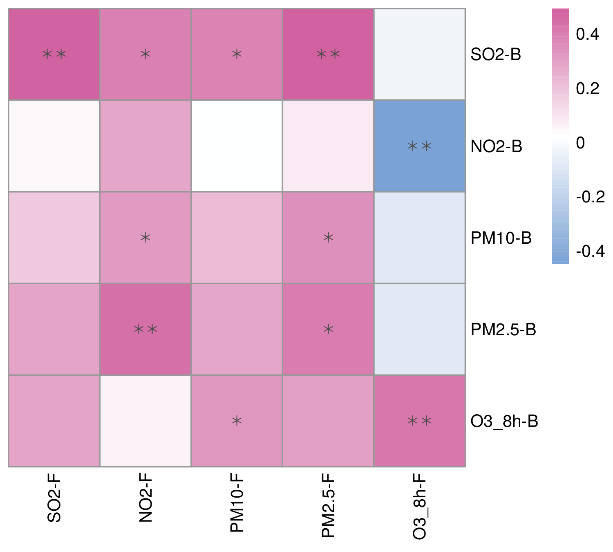


SFig 2 . Clustering analysis of different pollutants before (F) and during lockdown (B) in differernt functional parts of Shanghai


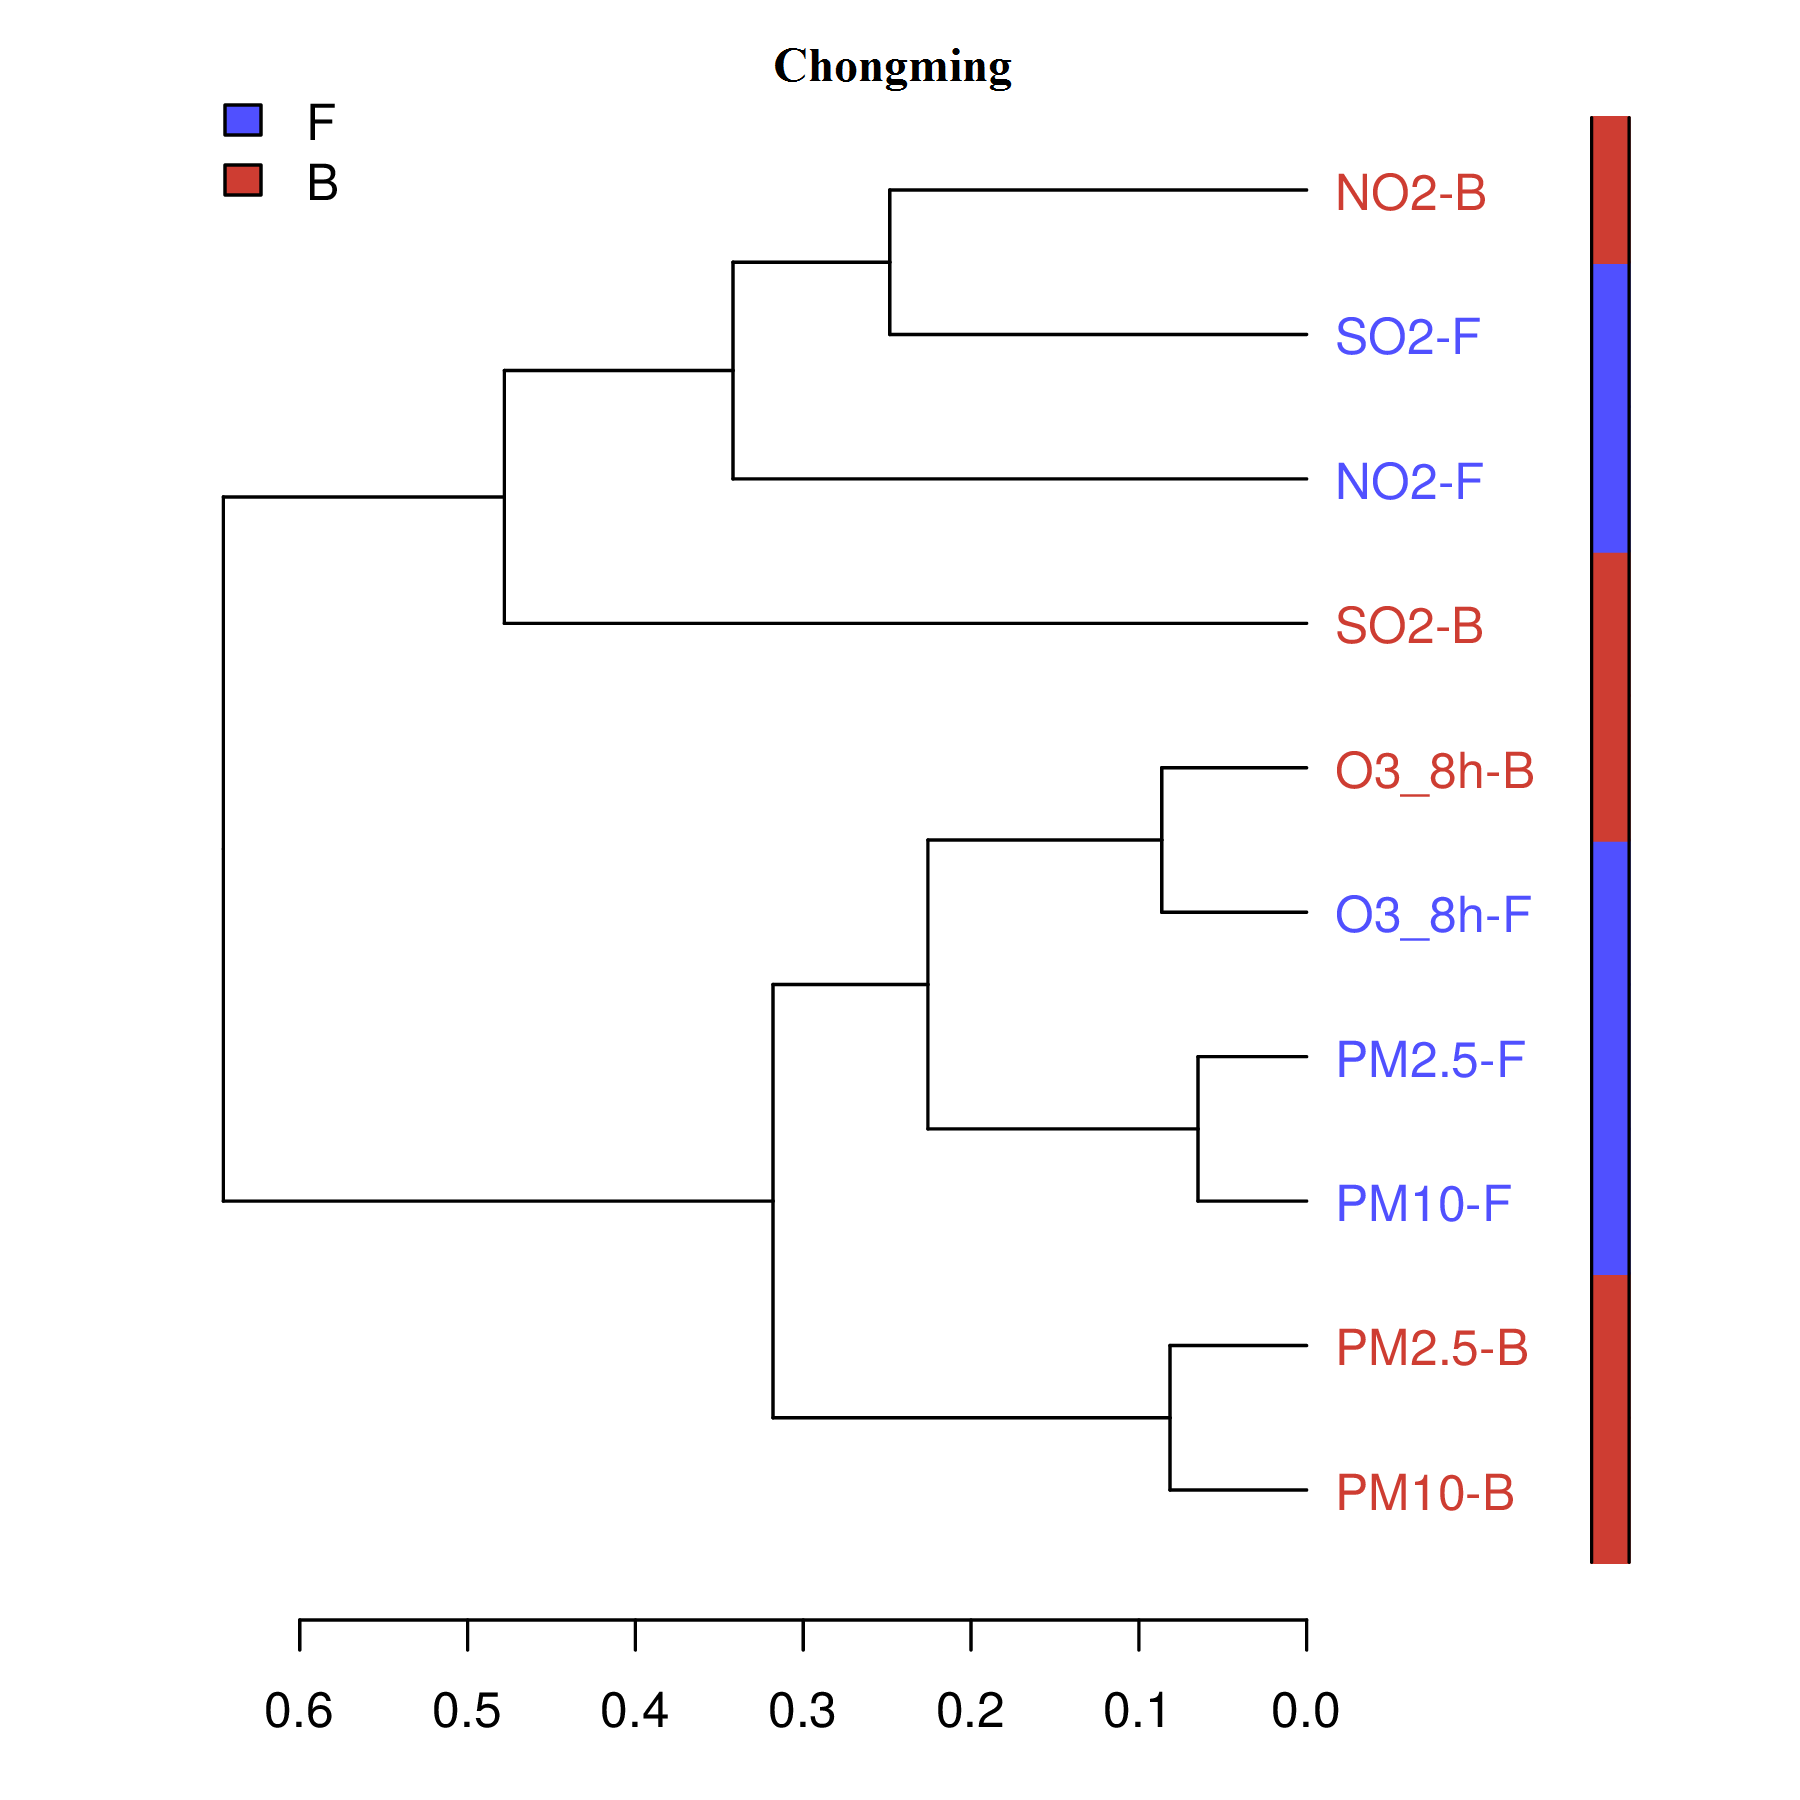

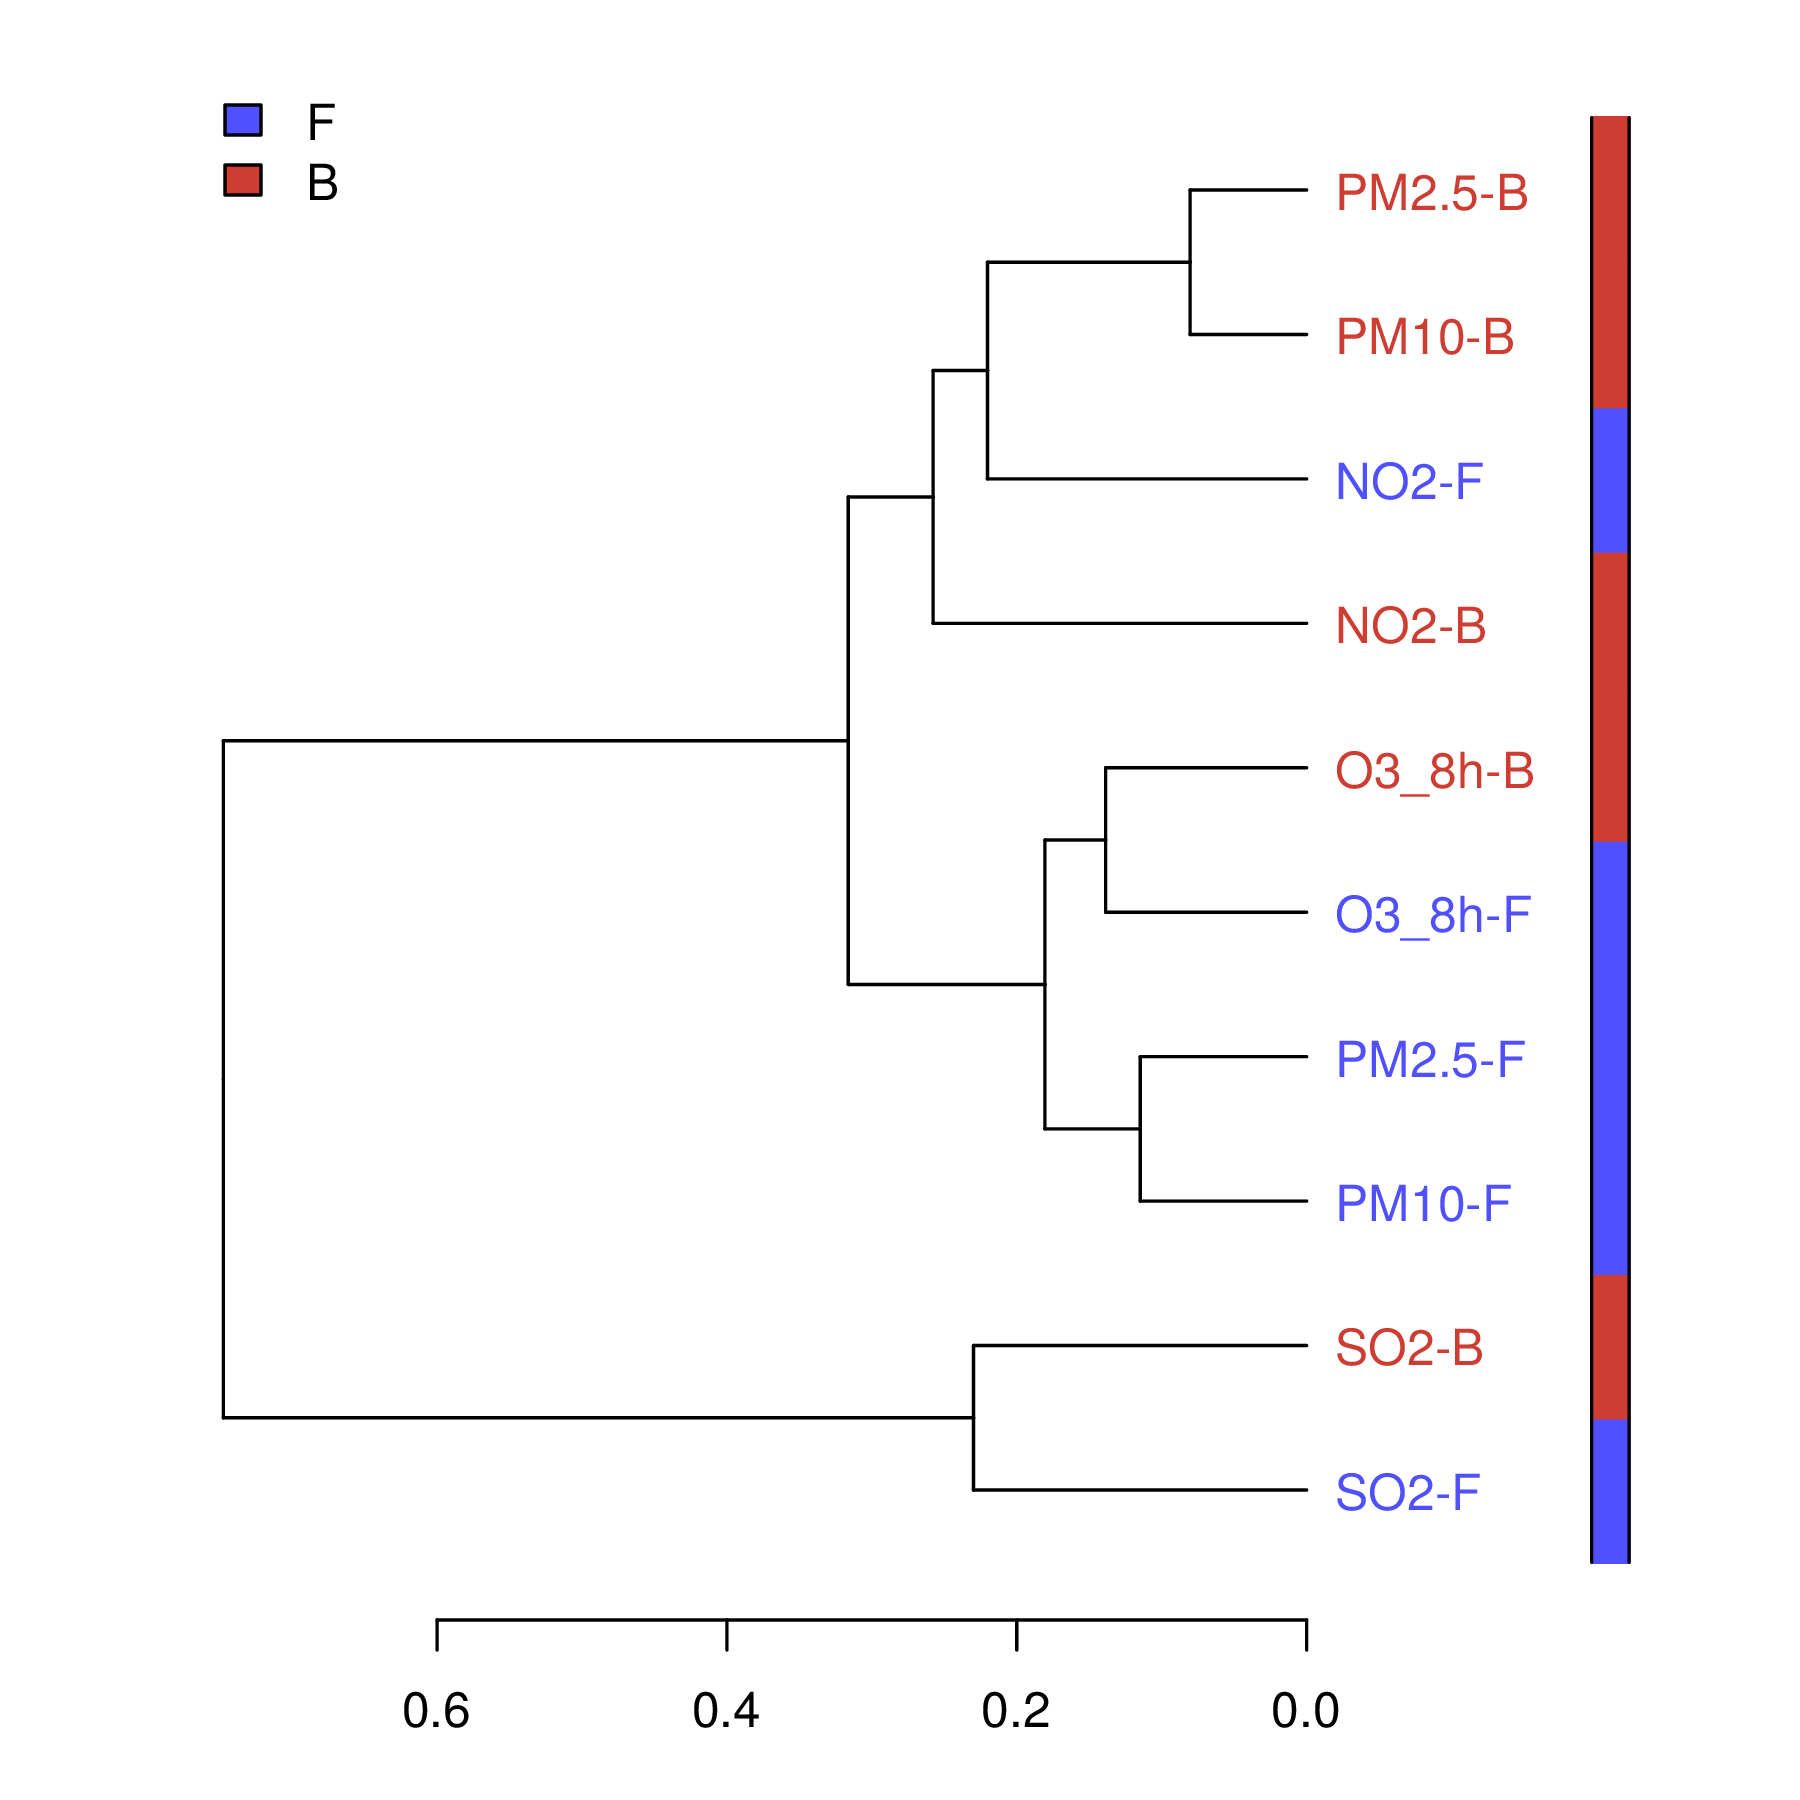


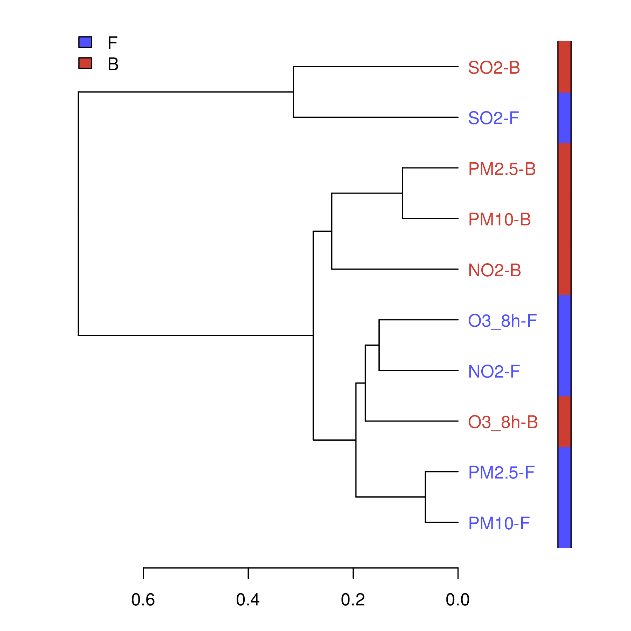

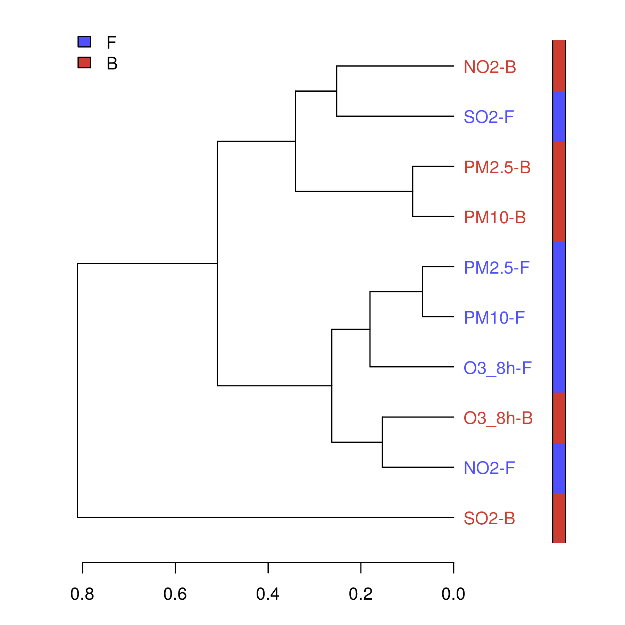

Supplement: Supplementary file 1 [file 67eda221f80f6a0223faee81.docx]
